# Supplementary material
Source: Springer Nature journal article supplement (https://www.springermedizin.de/resource/supplementary/12943_2010_723_MOESM10_ESM.pdf/9554660)

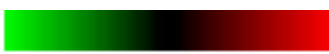

0.0 6.831 8.572

A549 NT  
A549 D  
A549 DR

**MMR**

**NER**

**NHEJ**

**HRR**

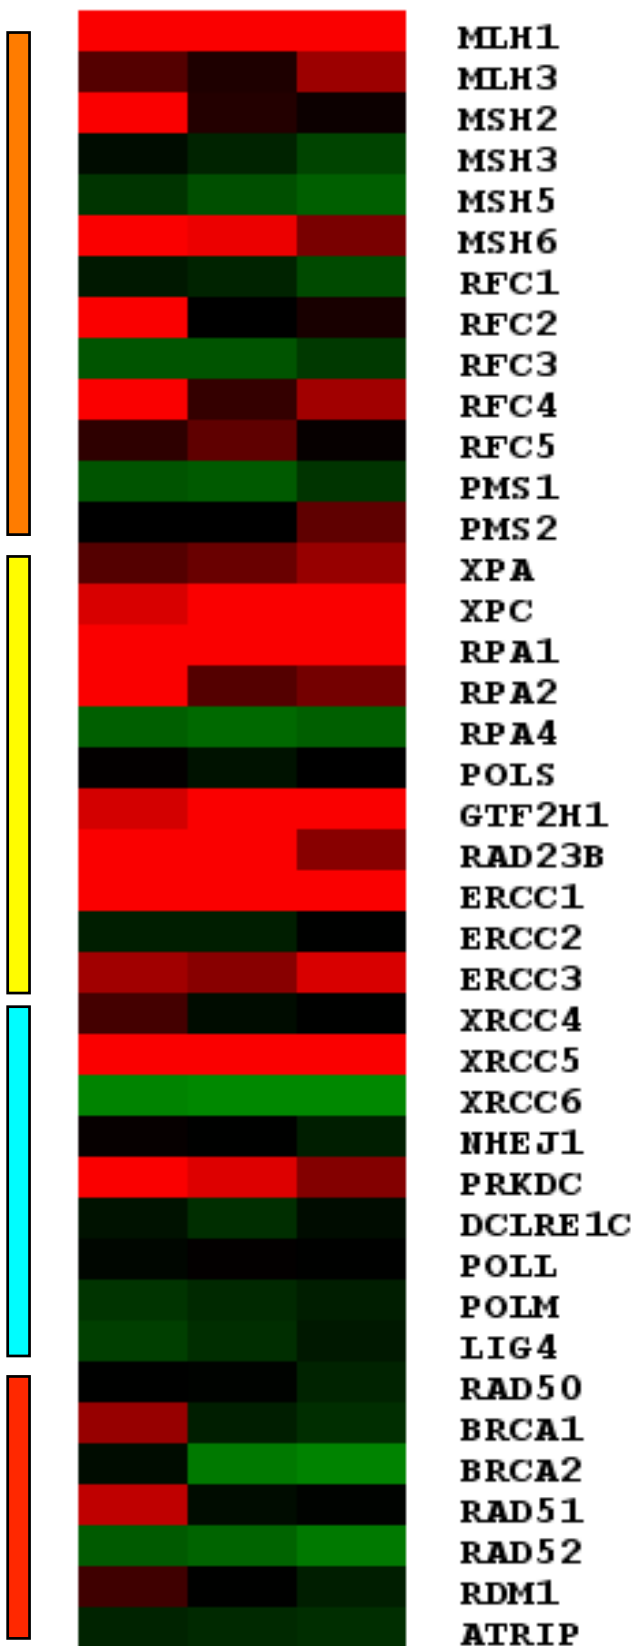

Supplement: MOESM10 [file 9554660]
